# Supplementary material
Source: MDPI journal article supplement (https://www.mdpi.com/2073-4352/11/11/1384)
Supplement: s1 [file s1]

# Electrochemical In Situ Fabrication of Titanium Dioxide Nanotubes on a Titanium Wire as a Fiber Coating for Solid-Phase Microextraction of Polycyclic Aromatic Hydrocarbons

Mingguang Ma, Yunxia Wei\*, Jie Chen, Qiong Shang

College of Chemical Engineering, Lan Zhou City University, Lanzhou, 730070, P. R.  
China

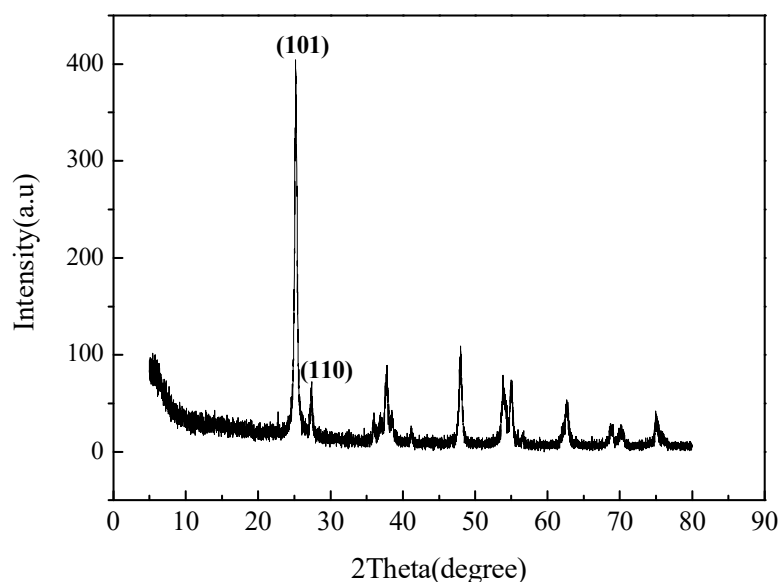

**Figure S1** XRD patterns of TiO<sub>2</sub>NTs

In the X-ray diffraction(XRD) image of TiO<sub>2</sub>NTs, diffraction peaks at 25.2<sup>0</sup> and 27.3<sup>0</sup> are the characteristic diffraction peaks of 101 lattice plane of anatase and 110 lattice plane of rutile. It can be seen from Fig.S1, the crystalline structures of TiO<sub>2</sub>NTs obtained by in-situ anodization of Ti wire was almost all anatase type.

---

\* Corresponding author.

E-mail address: weiyx07@lzu.edu.cn
